# Supplementary material for: A polyoxometalate-modified magnetic nanocomposite: a promising antibacterial material for water treatment
Source: Royal Society of Chemistry journal article supplement (doi:10.1039/c8tb03331e), 2019-01-01
Supplement: c8tb03331e1.pdf [file c8tb03331e1.pdf]

## Supporting Information

### Polyoxometalate-modified magnetic nanocomposite: A promising antibacterial material for water treatment

Yan Fang, Cuili Xing, Shixia Zhan, Meng Zhao, Mingxue Li\*, Hongling Liu\*

*Henan Key Laboratory of Polyoxometalates, Institute of Molecular and Crystal Engineering, College of Chemistry and Chemical Engineering, Henan University, Kaifeng 475004, PR China*

\*E-mail: [limingxue@henu.edu.cn](mailto:limingxue@henu.edu.cn) (M.-X. Li);

[hlliu@henu.edu.cn](mailto:hlliu@henu.edu.cn) (H.L.Liu)

## Contents

### 1. Experimental section

1.1 Chemicals and Materials

1.2 Characterization

1.3 Preparation of POM

1.4 Preparation of nickel foam

1.5 X-ray crystallography

### 2. Supplementary characterization

**Fig. S1.** (A) Crystal structure of POM, (B) Molecular packing projected.

**Fig. S2.** (A) FT-TR spectra, (B) PXRD pattern of Standberg-type POM.

**Fig. S3.** Optical images of surface pretreated nickel foam (left) and Fe<sub>3</sub>O<sub>4</sub>@PDA@POM modified nickel foam (right).

**Fig. S4.** EDX spectrum of the Fe<sub>3</sub>O<sub>4</sub>@PDA@POM nanocomposite.

**Fig. S5.** The PXRD analysis of Fe<sub>3</sub>O<sub>4</sub>@PDA@POM nanocomposite in different solution (physiological buffers with pH of 6~8, 0.75% NaCl solution, and water) after 12 h dispersal.

**Fig. S6.** Nickel foam as the schematic diagram of filter membrane, with asepsis injector as reaction vessel.

**Table S1.** The application status of several surface modified Fe<sub>3</sub>O<sub>4</sub>@PDA nanocomposite.

**Table S2.** Crystal data and structure refinement results for POM.

**Table S3.** Metal element contents of the Fe<sub>3</sub>O<sub>4</sub>@PDA@POM nanocomposite based on ICP measurement.

**Table S4.** The control antibacterial studies against *E. coli*, [P<sub>2</sub>Mo<sub>5</sub>O<sub>23</sub>]<sup>6-</sup>, Cu<sup>2+</sup> and L were assayed as the control.

**Table S5.** The antibacterial performance comparisons of the Fe<sub>3</sub>O<sub>4</sub> coating nanocomposites already reported.

### 3. Notes and references

## 1. Experimental section

### 1.1 Chemicals and Materials

Ferric chloride hexahydrate ( $\text{FeCl}_3 \cdot 6\text{H}_2\text{O}$ ), sodium acrylate (Na acrylate), sodium acetate (NaOAc), ethylene glycol (EG), dopamine hydrochloride (DA) and trihydroxymethyl aminomethane (Tris) were obtained from Aldrich. Copper(II) perchlorate hexahydrate ( $\text{Cu}(\text{ClO}_4)_2 \cdot 6\text{H}_2\text{O}$ , 98%), 2-aminopyridine ( $\text{C}_5\text{H}_6\text{N}_2$ ), sodium molybdate dihydrate ( $\text{Na}_2\text{MoO}_4 \cdot 2\text{H}_2\text{O}$ , 99%) and phosphoric acid ( $\text{H}_3\text{PO}_4$ , 85%) were purchased from J&K Scientific Ltd. Ni foams (99.8% purity, 0.5 mm thickness, 110 PPI pore size) were purchased from Yilongsheng energy technology co., Ltd. (Jiangsu, PR China). All chemicals were analytical grade and used without further purification. Deionized water was used for all synthetic processes.

### 1.2 Characterization

The microstructure and grain size of the nanoparticles were obtained by X-ray diffraction patterns (XRD, Philips X'Pert Pro, Philips, Amsterdam, Netherlands;  $\lambda = 1.54056\text{\AA}$ ) equipped with Cu  $K\alpha$  radiation, transmission electron microscopy (TEM, FEI Tecnai G2 F30) and scanning electron microscopy images (SEM, Zeiss supra55). X-ray photoelectron spectroscopy (XPS) data were acquired on a scanning X-ray microprobe (Escalab 250xi) with Al  $K\alpha$  radiation as the excitation source. ICP analysis was performed using PerkinElmer (Optima 2100DV) machine to analyse copper (Cu) and molybdenum (Mo) concentration arising from POM in the sample. Elemental analyses (C, H and N) were investigated on a Perkin-Elmer 240 analyzer. The Fourier transform infrared (FT-IR) spectra were recorded with the wavelength range of  $500\text{--}4000\text{ cm}^{-1}$  using an Avatar 360 FTIR spectrometer (FTIR, Nicolet Company, USA). The magnetic properties were subsequently investigated by a vibrating sample magnetometry (VSM, Lakeshore 7300). Zeta potential measurements were carried out in deionized water (pH 7.0) with a ZETASIZER Nano ZS instrument. The morphological changes of bacteria were monitored using SEM micrographs (Gemini 500). The UV-Vis absorption spectrum was recorded with a TU-1900 spectrometer (Beijing Purkinje General Instrument Co., Ltd., Beijing, China) at room temperature.

### 1.3 Preparation of POM

An methanol solution containing  $\text{Cu}(\text{ClO}_4)_2 \cdot 6\text{H}_2\text{O}$  (0.056 g, 0.15 mmol) and 2-aminopyridine (0.028 g, 0.3 mmol) was stirred at  $50\text{ }^\circ\text{C}$  for 30 min. After cooling to room temperature, the solution was added to a 10 mL aqueous solution of  $\text{Na}_2\text{MoO}_4 \cdot 2\text{H}_2\text{O}$  (0.145 g, 0.6 mmol), the pH value was maintained at 3.0 by dropwise addition of concentrated  $\text{H}_3\text{PO}_4$  under continuous stirring. Then the mixture was stirred for 30 min and then filtered. The filtrate was placed at room temperature for slow evaporation. Blue crystals suitable for X-ray studies were obtained after 3 days. Yield: approx. 59% (based on Cu). Elemental analysis for  $\text{C}_{40}\text{H}_{56}\text{Cu}_2\text{Mo}_{10}\text{N}_{16}\text{O}_{54}\text{P}_4$ : calcd. C 16.90, H 1.92, N 7.89, Mo 33.83, Cu 4.48; Found: C 16.94, H 1.99, N 7.90, Mo 33.80, Cu 4.42. IR (KBr,  $\text{cm}^{-1}$ ): 3324 (m), 3100 (w), 1660 (s), 1628 (s), 1543 (m), 1480 (m), 1421 (w), 1378 (m), 1328 (m), 1251 (w), 1168 (m), 1094 (s), 1032 (s), 915 (s), 898 (s), 786 (w), 694 (s), 585 (w).

## 1.4 Preparation of nickel foam

The pristine nickel foam was disposed according to the previous report by an optimized facile one-step hydrothermal method. Ni(OH)<sub>2</sub> hexagonal platelets were fabricated with sharp edges and high density.<sup>1</sup>

## 1.5 X-ray crystallography

A Siemens SMART-CCD diffractometer with graphite-monochromated MoK $\alpha$  radiation ( $\lambda = 0.71073 \text{ \AA}$ ) was applied to collect the crystallographic data. The crystal structures of these complexes were solved through direct methods and refined by full-matrix least squares on  $F^2$  with anisotropic displacement parameters for all non-hydrogen atoms using SHELXTL.<sup>2</sup> All hydrogen atoms were fixed at idealized geometrical positions. The crystallographic data, experimental details, and refinement results are summarized in Table S2. CCDC 1861727 contains the supplementary crystallographic data for this paper. These data can be obtained free of charge from The Cambridge Crystallographic Data Centre.

## 2. Supplementary characterization

The crystal structure of Standberg-type POM was shown in Fig. S1. The successful synthesis of POM was confirmed by FT-IR and PXRD characterizations (Fig. S2). The POM shows characteristic peaks of the [P<sub>2</sub>Mo<sub>5</sub>O<sub>23</sub>]<sup>6-</sup> polyoxoanion: the peaks at 1093 cm<sup>-1</sup>, 1032 cm<sup>-1</sup> and 898 cm<sup>-1</sup> are attributed to  $\nu(\text{P-O})$  and  $\nu(\text{Mo=O}_d)$  stretching vibration, respectively.<sup>3,4</sup> These results are in good accordance with those of the X-ray diffraction structural analysis. PXRD spectra of as-prepared POM match well with the simulated pattern.

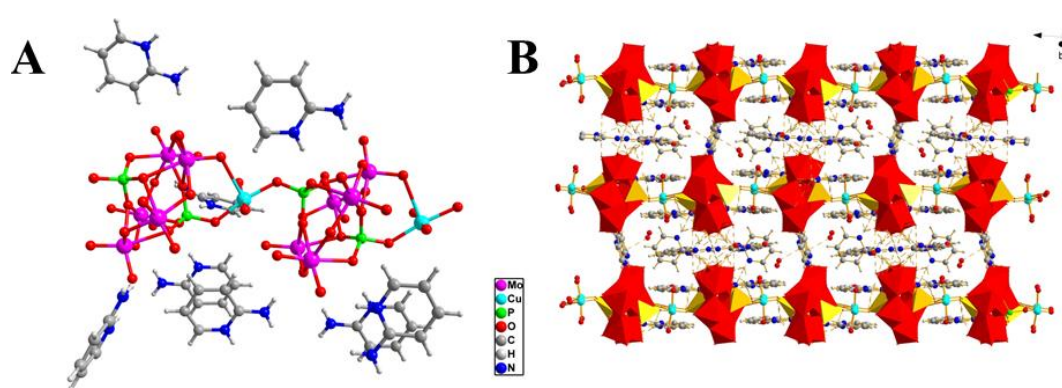

**Fig. S1.** (A) Crystal structure of POM, (B) Molecular packing projected.

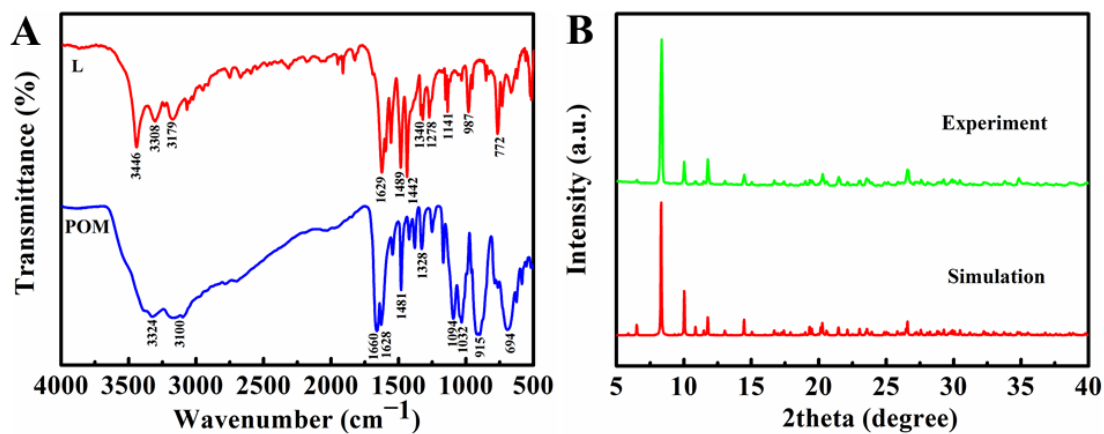

**Fig. S2.** (A) FT-TR spectra, (B) PXRD pattern of Standberg-type POM.

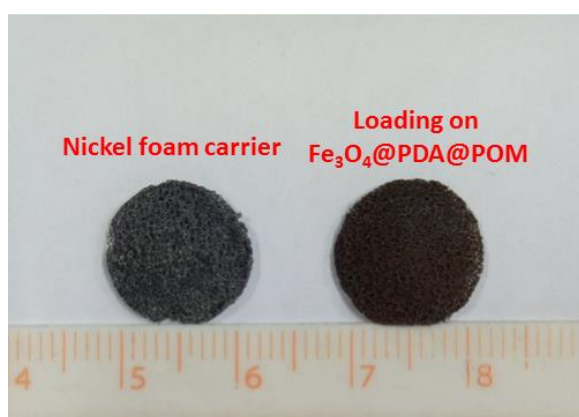

**Fig. S3.** Optical images of surface pretreated nickel foam (left) and Fe<sub>3</sub>O<sub>4</sub>@PDA@POM modified nickel foam (right).

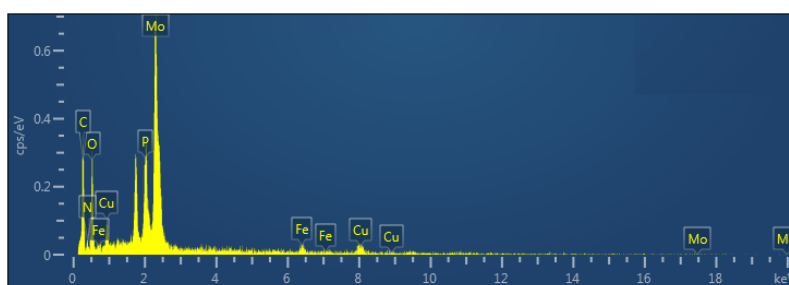

**Fig. S4.** EDX spectrum of the Fe<sub>3</sub>O<sub>4</sub>@PDA@POM nanocomposite.

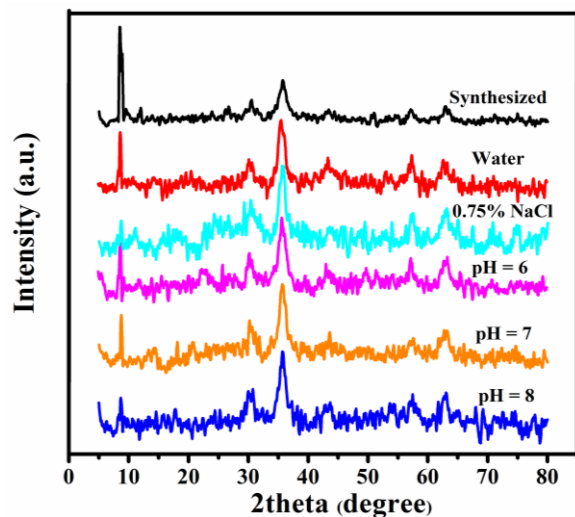

**Fig. S5.** The PXRD analysis of  $\text{Fe}_3\text{O}_4\text{@PDA@POM}$  nanocomposite in different solution (physiological buffers with pH of 6~8, 0.75% NaCl solution, and water) after 12 h dispersal.

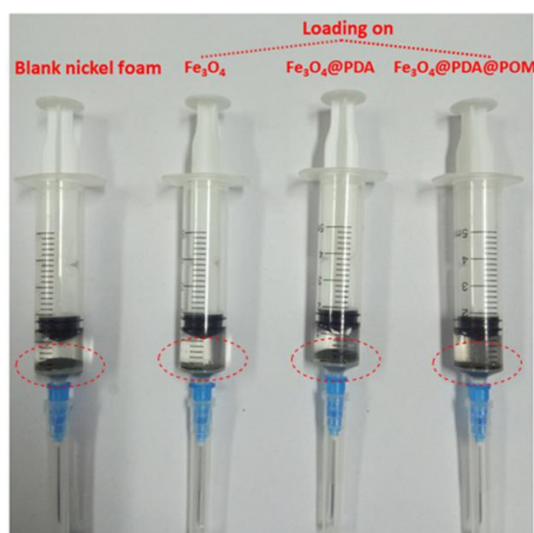

**Fig. S6.** Nickel foam as the schematic diagram of filter membrane, with asepsis injector as reaction vessel.

**Table S1.** The application status of several surface modified  $\text{Fe}_3\text{O}_4\text{@PDA}$  nanocomposite.

| Nanocomposites                                   | Surface modifier                                                     | Reaction conditions | Applications                                    | Ref |
|--------------------------------------------------|----------------------------------------------------------------------|---------------------|-------------------------------------------------|-----|
| $\text{Fe}_3\text{O}_4\text{-HGPNPs-Ab}_2$       | Hollow gold nanoparticles;<br>Antibody                               | Stirred             | Determination of human<br>IgG                   | 5   |
| $\text{Fe}_3\text{O}_4\text{@PDA/Au/PDA/Au/PDA}$ | $\text{HAuCl}_4$                                                     | Aqueous solution    | Catalyze the p-nitrophenol                      | 6   |
| $\text{MF@Fe}_3\text{O}_4\text{@PDA/PSBMA}$      | Multifunctional melamine<br>foam; Poly(sulfobetaine<br>methacrylate) | Stirring            | Aeparate oil/water mixtures<br>and cationic-dye | 7   |

|                                                            |                                 |                         |                                                                                    |       |
|------------------------------------------------------------|---------------------------------|-------------------------|------------------------------------------------------------------------------------|-------|
| Fe <sub>3</sub> O <sub>4</sub> @PDA@Ag                     | Ammonia silver solution         | Ammonia silver solution | Organic dyes removal                                                               | 8,9   |
| Fe <sub>3</sub> O <sub>4</sub> @PDA@UiO-66-NH <sub>2</sub> | UiO-66-NH <sub>2</sub>          | Heat, 140 °C            | Extract polychlorinated biphenyls; Enrichment of glycopeptides and phosphopeptides | 10,11 |
| Fe <sub>3</sub> O <sub>4</sub> @PDA@ZIF-8                  | Zeolitic imidazolate frameworks | Ultrasonication         | Extract low-abundance peptides                                                     | 12    |
| Fe <sub>3</sub> O <sub>4</sub> @PDA-SO <sub>3</sub> H      | Sulfonic acid                   | Stirring                | The formylation of alcohols and amines                                             | 13    |

**Table S2.** Crystal data and structure refinement results for POM.

| <b>Crystal Data</b>                              |                                                                                                                 |
|--------------------------------------------------|-----------------------------------------------------------------------------------------------------------------|
| Empirical formula                                | C <sub>40</sub> H <sub>56</sub> Cu <sub>2</sub> Mo <sub>10</sub> N <sub>16</sub> O <sub>54</sub> P <sub>4</sub> |
| Formula weight                                   | 2835.37                                                                                                         |
| crystal system                                   | Triclinic                                                                                                       |
| space group                                      | <i>P</i> -1                                                                                                     |
| Temperature (K)                                  | 296(2)                                                                                                          |
| <i>a</i> (Å)                                     | 18.1100(11)                                                                                                     |
| <i>b</i> (Å)                                     | 21.2840(13)                                                                                                     |
| <i>c</i> (Å)                                     | 21.7984(14)                                                                                                     |
| <i>α</i> (deg)                                   | 90.00                                                                                                           |
| <i>β</i> (deg)                                   | 103.2850(10)                                                                                                    |
| <i>γ</i> (deg)                                   | 90.00                                                                                                           |
| Volume (Å <sup>3</sup> )                         | 8177.4(9)                                                                                                       |
| <i>Z</i>                                         | 4                                                                                                               |
| Calculated density (g cm <sup>-3</sup> )         | 2.303                                                                                                           |
| Crystal size (mm <sup>3</sup> )                  | 0.28×0.23×0.14                                                                                                  |
| Theta range for data collection (deg)            | 1.50–25.00                                                                                                      |
| <i>F</i> (000)                                   | 5512                                                                                                            |
| Limiting indices                                 | −21 ≤ <i>h</i> ≤ 21, −17 ≤ <i>k</i> ≤ 25, −25 ≤ <i>l</i> ≤ 25                                                   |
| <i>R</i> <sub>int</sub>                          | 0.0252                                                                                                          |
| parameters                                       | 1060                                                                                                            |
| Reflections collected / unique                   | 14320/11807                                                                                                     |
| Final R indices [ <i>I</i> ≥ 2σ( <i>I</i> )]     | <i>R</i> <sub>1</sub> = 0.0383, <i>wR</i> <sub>2</sub> = 0.1023                                                 |
| R indices (all data)                             | <i>R</i> <sub>1</sub> = 0.0499, <i>wR</i> <sub>2</sub> = 0.1086                                                 |
| Largest diff. peak and hole (e Å <sup>-3</sup> ) | 2.526, − 2.050                                                                                                  |

**Table S3.** Metal element contents of the Fe<sub>3</sub>O<sub>4</sub>@PDA@POM nanocomposite based on ICP measurement.

| Samples                                 | Element contents (wt%) |      |      |
|-----------------------------------------|------------------------|------|------|
|                                         | Fe                     | Mo   | Cu   |
| Fe <sub>3</sub> O <sub>4</sub> @PDA@POM | 29.98                  | 6.28 | 1.05 |

**Table S4.** The control antibacterial studies against *E. coli*,  $[P_2Mo_5O_{23}]^{6-}$ ,  $Cu^{2+}$  and L were assayed as the control.

|                                        | Samples Name |      |      |      |           |                        |
|----------------------------------------|--------------|------|------|------|-----------|------------------------|
|                                        | POM          |      |      | L    | $Cu^{2+}$ | $[P_2Mo_5O_{23}]^{6-}$ |
| Amounts ( $\mu\text{mol}$ )            | 0.1          | 0.2  | 0.5  | 2.6  | 0.6       | 0.5                    |
| Corresponding bacterial cell death (%) | 55.9         | 79.8 | 91.6 | 17.0 | 58.2      | 49.5                   |

$Cu^{2+}$  derived from  $Cu(ClO_4)_2 \cdot 6H_2O$  ( $M=370.53 \text{ g mol}^{-1}$ );  $[P_2Mo_5O_{23}]^{6-}$  derived from  $(NH_4)_6[P_2Mo_5O_{23}]$  ( $M=997.70 \text{ g mol}^{-1}$ ).

**Table S5.** The antibacterial performance comparisons of the  $Fe_3O_4$  coating nanocomposites already reported.

| Materials                   | Bacteria                                                                 | Size (nm)       | Antibacterial activity                   | Advantages                                                                                        | Ref.       |
|-----------------------------|--------------------------------------------------------------------------|-----------------|------------------------------------------|---------------------------------------------------------------------------------------------------|------------|
| Graphene- $Fe_3O_4$         | <i>E. coli</i>                                                           | 200~250         | 74% (24 h)                               | Facile, suitable for water purification                                                           | 14         |
| $Fe_3O_4@PDA@PAMAM@NONOate$ | <i>E. coli</i> , <i>S. aureus</i>                                        | 262             | 38%, 40% (20min)                         | Facile, easy recovery                                                                             | 15         |
| $Fe_3O_4/Ag@NFC$            | <i>S. aureus</i>                                                         | 20~30           | —                                        | Facile, environmentally friendly, recyclable, suitable for medical and environmental applications | 16         |
| $Fe_3O_4@CdS$               | <i>E. coli</i> , <i>S. saprophyticus</i>                                 | $14.2 \pm 0.20$ | MIC = 5.0, 4.0 mg/mL (24h)               | High effective, stability, reusability, suitable for environmental remediation                    | 17         |
| GO/ $Fe_3O_4$ /NPVP/Ag      | <i>E. coli</i> , <i>S. aureus</i>                                        | 20~50           | MIC = 31.25, 62.5 $\mu\text{g/mL}$ (24h) | Effective, low cytotoxicity, suitable for medical care and food packaging                         | 18         |
| $Fe_3O_4/Cu$                | <i>S. aureus</i> , <i>Bacillus Subtilis</i> , <i>E. coli</i>             | 62              | MIC = 0.01, 0.04, 0.03 mg/ml             | Facile, environmental compatibility                                                               | 19         |
| g- $Fe_3O_4/2RGO$           | <i>Staphylococcus aureus</i> , <i>Bacillus subtilis</i> , <i>E. coli</i> | $22 \pm 2$      | MIC = 16, 10, 11.2 mg/mL                 | Good separation, easy recovery, suitable for pharmaceuticals and biomedical sectors               | 20         |
| $Fe_3O_4@PDA@POM$           | <i>E. coli</i> , <i>S. aureus</i>                                        | 340             | 99.9%, 99.9% (15 min)                    | Facile, high effective, recyclable, suitable for water treatment                                  | This paper |

### 3. Notes and references

- 1 L. J. Li, J. Xu, J. L. Lei, J. Zhang, F. McLarnon, Z. D. Wei, N. B. Li and F. S. Pan, *J. Mater. Chem. A*, 2015, **3**, 1953–1960.
- 2 G. M. Sheldrick, SHELXTL, Software Reference Manual, version 5.1; Bruker Analytical X-ray Instruments Inc: Madison; WI, 1997.
- 3 T. X. Wei, Y. Y. Chen, W. W. Tu, Y. Q. Lan and Z. H. Dai, *Chem. Commun.*, 2014, **50**, 9357–9360.
- 4 Y. M. Ji, C. G. Ma, J. Li, H. Y. Zhao, Q. Q. Chen, M. X. Li and H. L. Liu, *Nanomaterials*, 2018, **8**, 710–722.
- 5 Q. Wu, Y. Sun, D. Zhang, S. Li, X. H. Wang and D. Q. Song, *Biosens. Bioelectron.*, 2016, **86**, 95–101.
- 6 J. F. Zhang, Q. L. Fang, J. Y. Duan, H. M. Xu, H. J. Xu and S. H. Xuan, *Langmuir*, 2018, **34**, 4298–4306.
- 7 Y. Q. Zhang, X. B. Yang, Z. X. Wang, J. Long and L. Shao, *J. Mater. Chem. A*, 2017, **5**, 7316–7325.
- 8 K. X. Cui, B. Yan, Y. J. Xie, H. Qian, X. G. Wang, Q. X. Huang, Y. H. He, S. M. Jin and H. B. Zeng, *J. Hazard. Mater.*, 2018, **350**, 66–75.
- 9 Y. J. Xie, B. Yan, H. L. Xu, J. Chen, Q. X. Liu, Y. H. Deng and H. B. Zeng, *ACS Appl. Mater. Inter.*, 2014, **6**, 8845–8852.
- 10 S. C. Lin, N. Gan, Y. T. Cao, Y. J. Chen and Q. L. Jiang, *J. Chromatogr., A*, 2016, **1446**, 34–40.
- 11 Y. Q. Xie and C. H. Deng, *Sci. Rep.*, 2017, **7**, 1162–1169.
- 12 M. Zhao, Y. Q. Xie, H. M. Chen and C. H. Deng, *Talanta*, 2017, **167**, 392–397.
- 13 S. Taheri, H. Veisi and M. Hekmati, *New J. Chem.*, 2017, **41**, 5075–5081.
- 14 C. Santhosh, P. Kollu, S. Doshi, M. Sharma, D. Bahadur, M. T. Vanchinathan, P. Saravanan, B. S. Kim and A. N. Grace, *RSC Adv.*, 2014, **4**, 28300–28308.
- 15 S. M. Yu, G. W. Li, R. Liu, D. Ma and W. Xue, *Adv. Funct. Mater.*, 2018, **28**, 1707440.
- 16 R. Xiong, C. H. Lu, Y. R. Wang, Z. H. Zhou and X. X. Zhang, *J. Mater. Chem. A*, 2013, **1**, 14910–14918.
- 17 A. Samadi-Maybodi, M. R. Shariati and A. H. Colagar, *ChemPlusChem*, 2018, **83**, 769–779.
- 18 Q. Li, C. Yong, W. Cao, X. Wang, L. Wang, J. Zhou and X. Xing, *J. Colloid Interface Sci.*, 2018, **511**, 285–295.
- 19 R. Heydari, M. F. Koudehi and S. M. Pourmortazav, *ChemistrySelect*, 2019, **4**, 531–535.
- 20 D. K. Padhi, T. K. Panigrahi, K. Parida, S. K. Singh and P. M. Mishra, *ACS Sustain. Chem. Eng.*, 2017, **5**, 10551–10562.
